# Supplementary material for: SigsPack, a package for cancer mutational signatures
Source: PubMed Central journal article supplement (PMC6720940; doi:10.1186/s12859-019-3043-7), 2019-09-02

Patient 69 – Reference sample 1

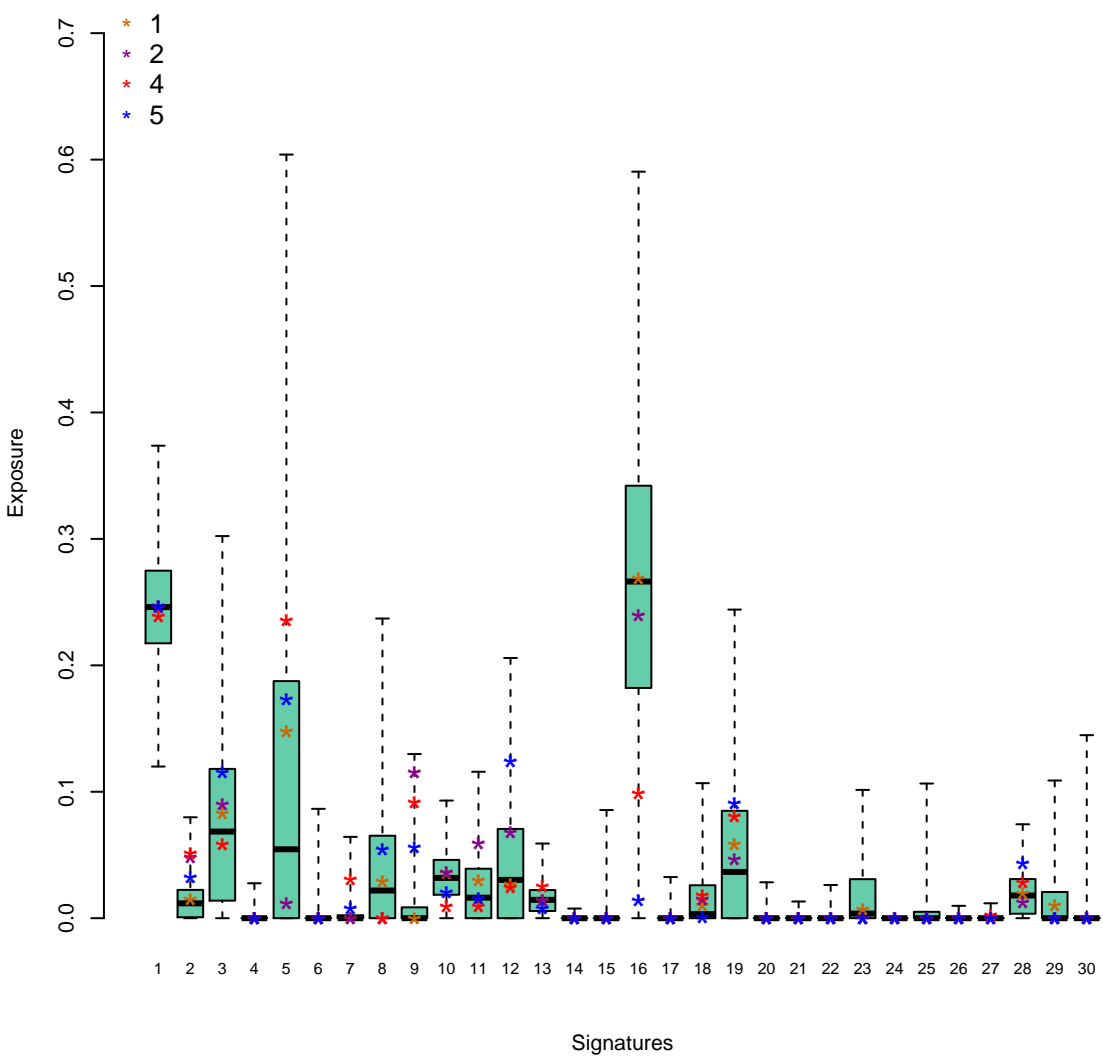

Patient 69 – Reference sample 2

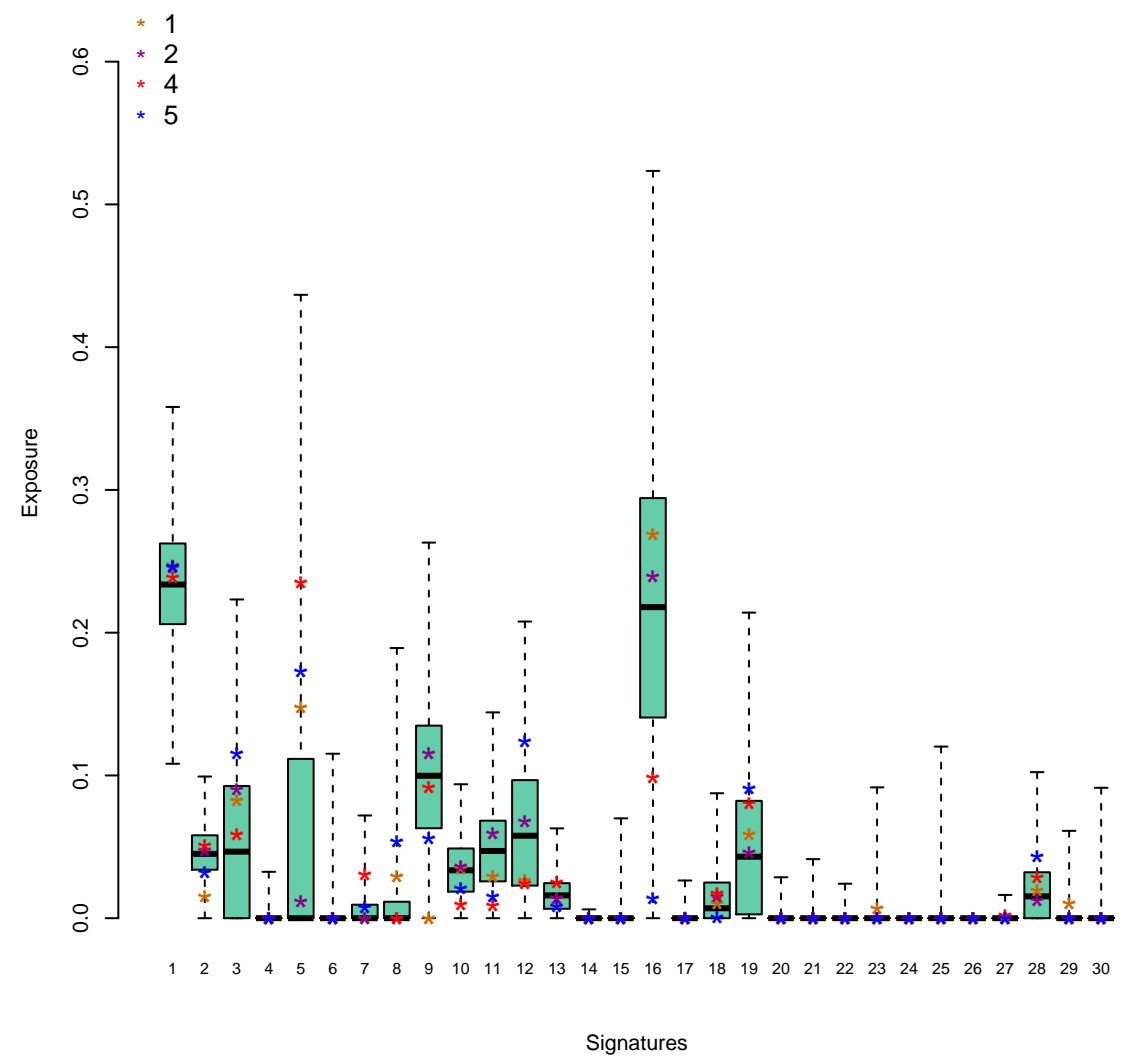

Patient 69 – Reference sample 4

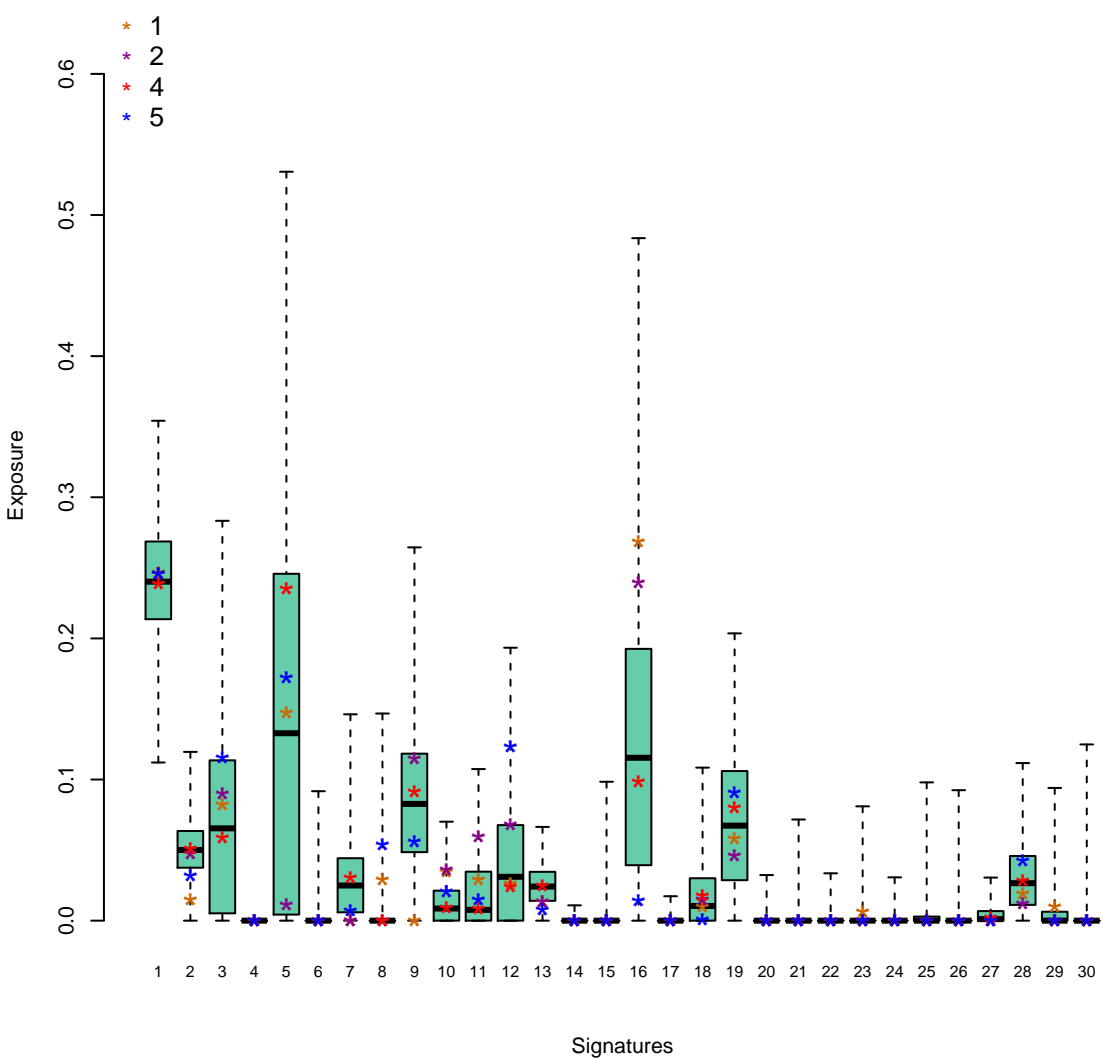

Patient 69 – Reference sample 5

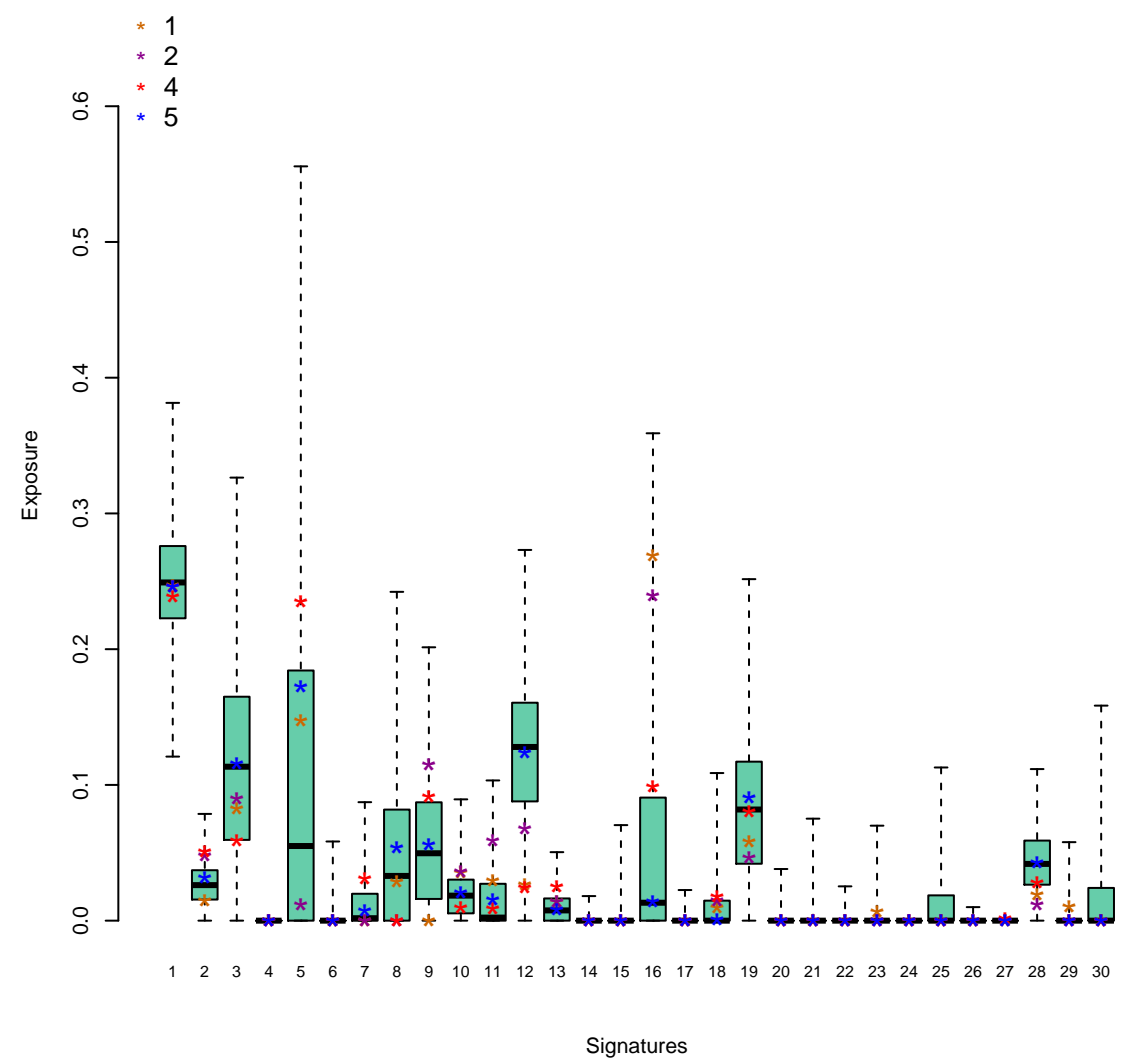

Patient 80 – Reference sample 1

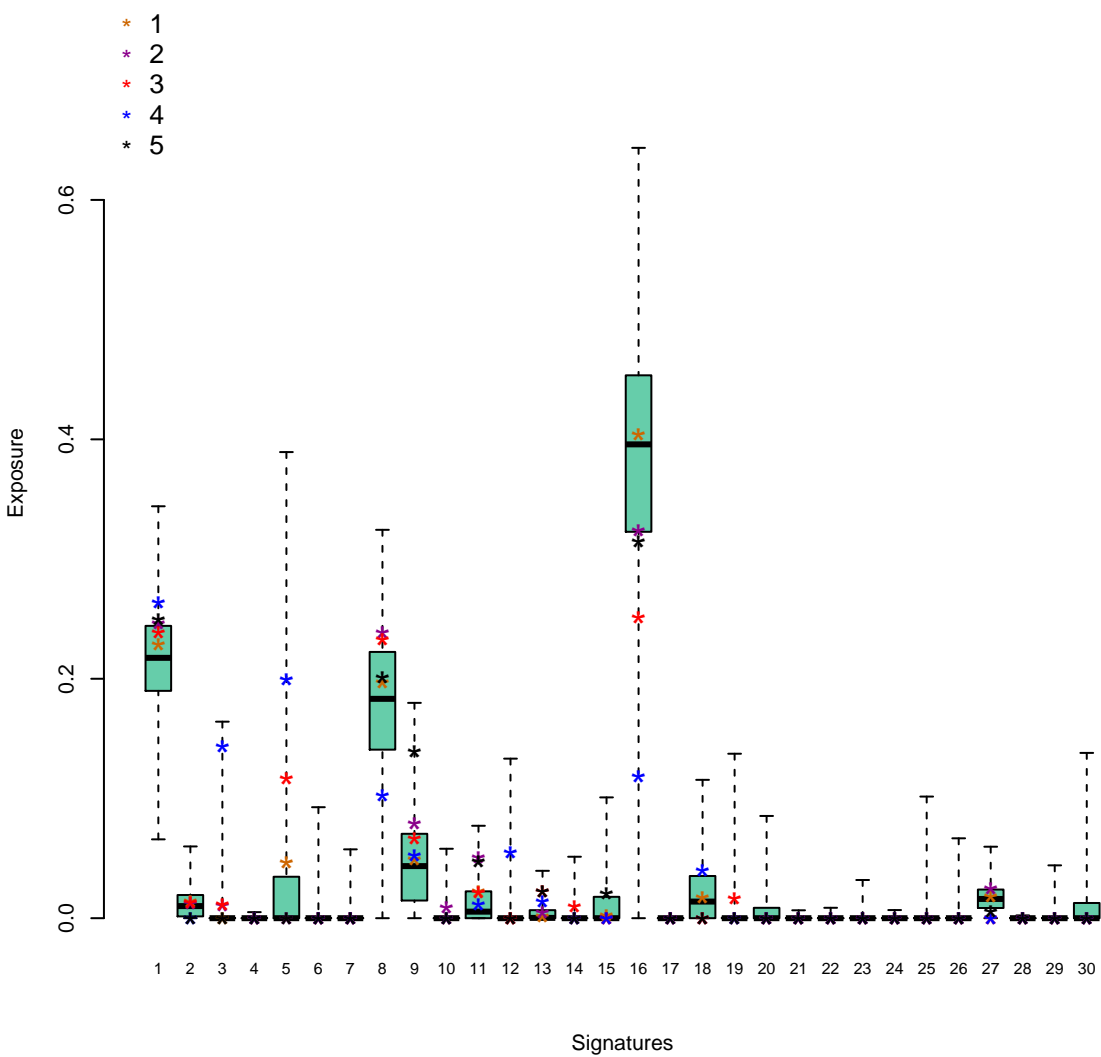

Patient 80 – Reference sample 2

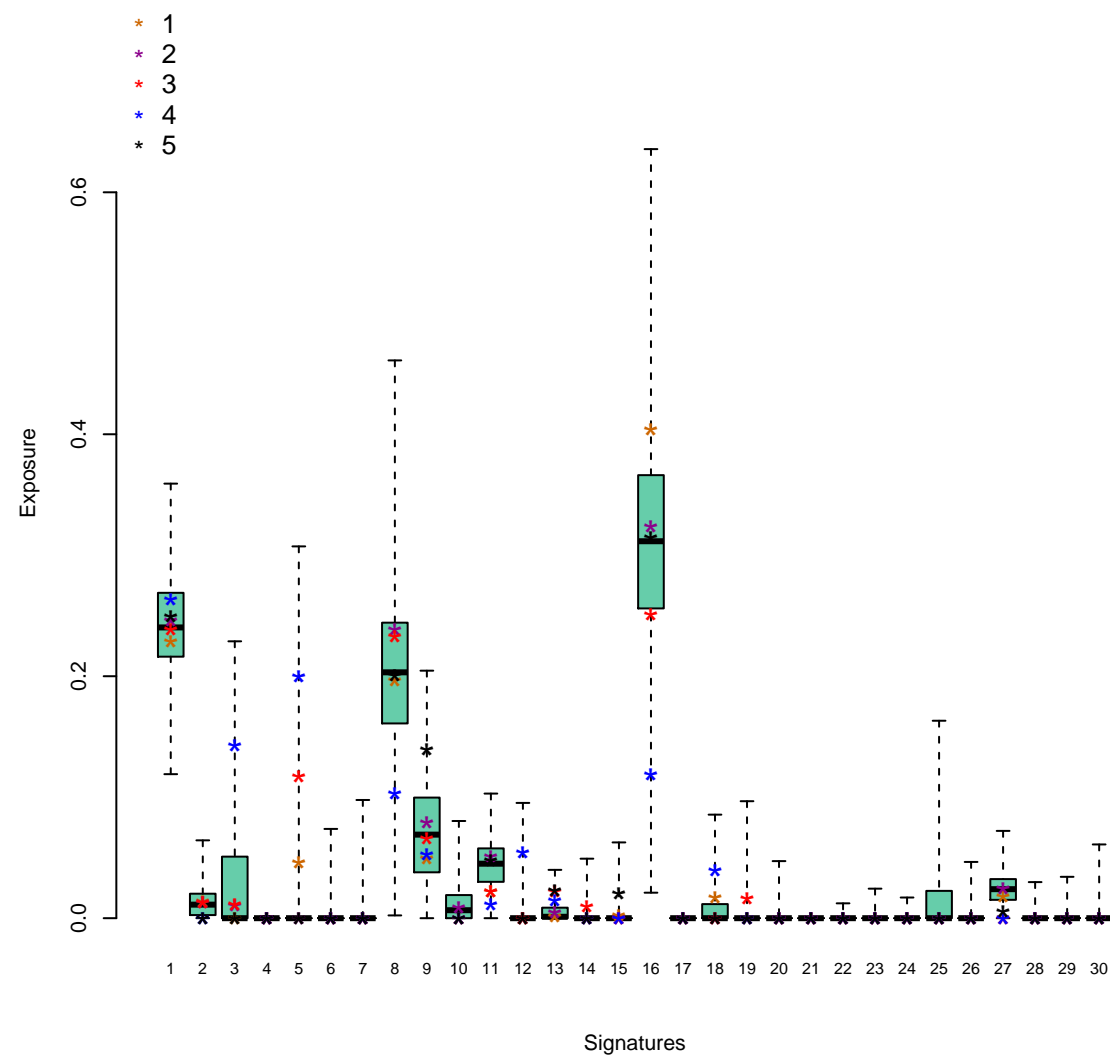

Patient 80 – Reference sample 3

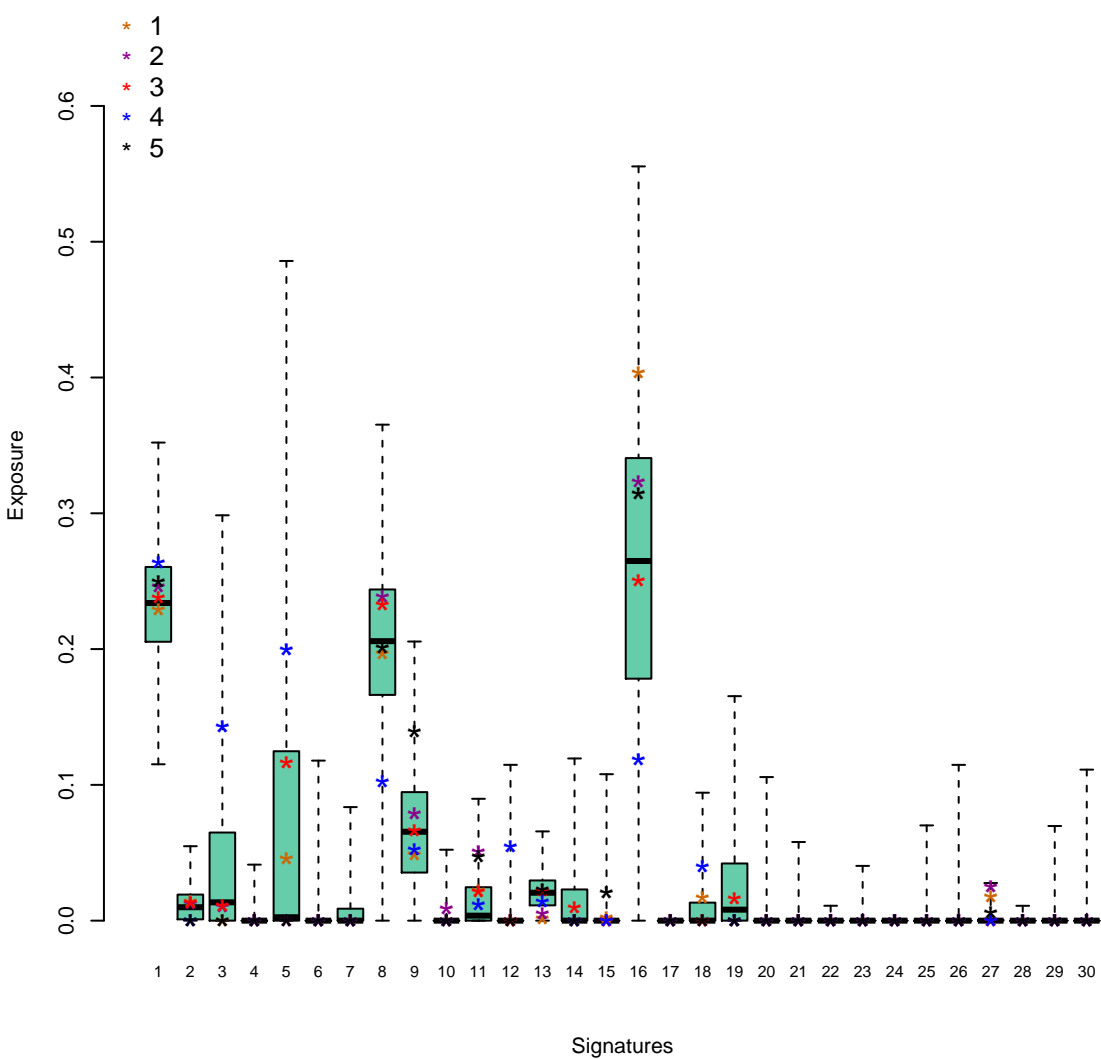

Patient 80 – Reference sample 4

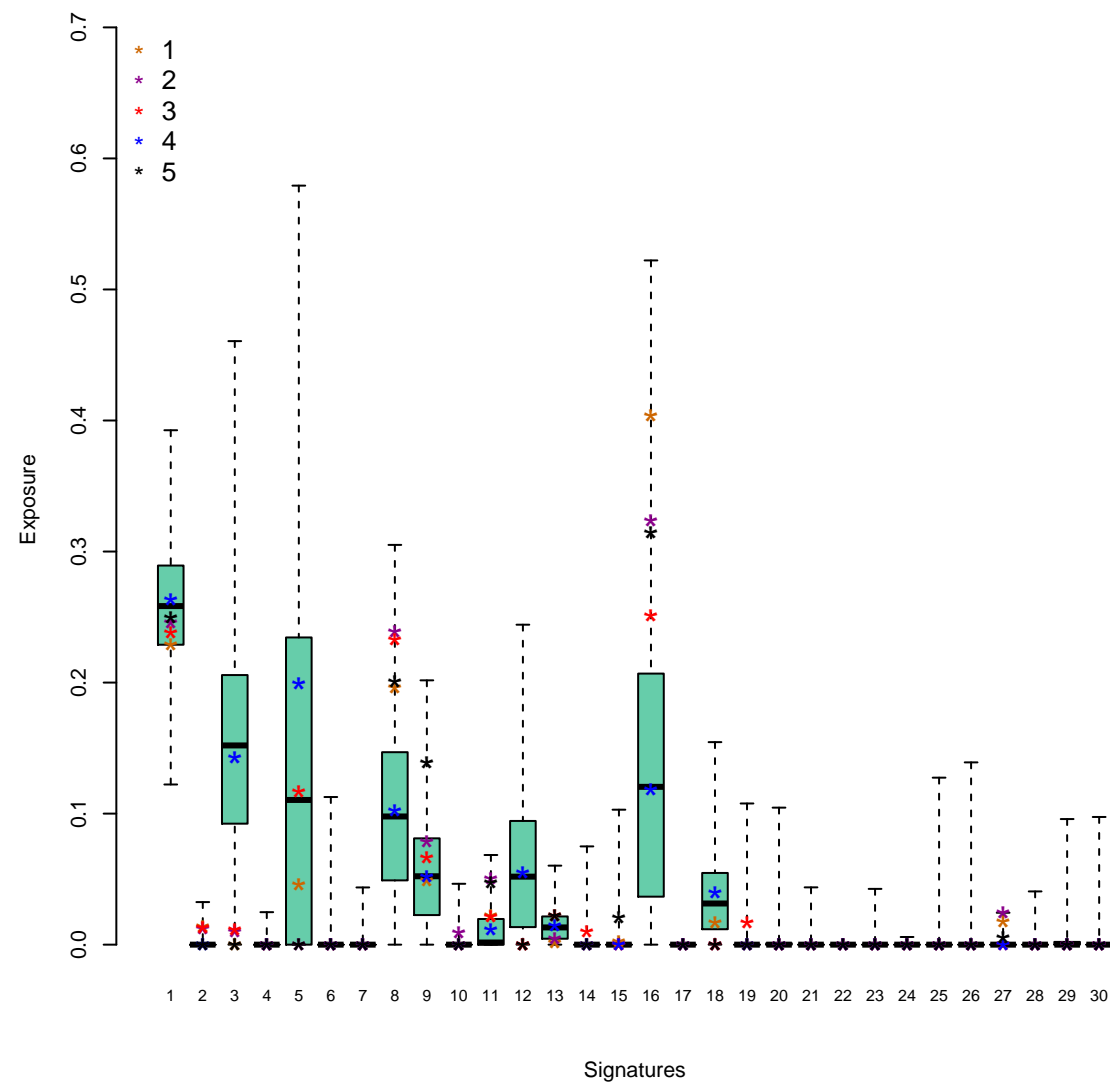

Patient 80 – Reference sample 5

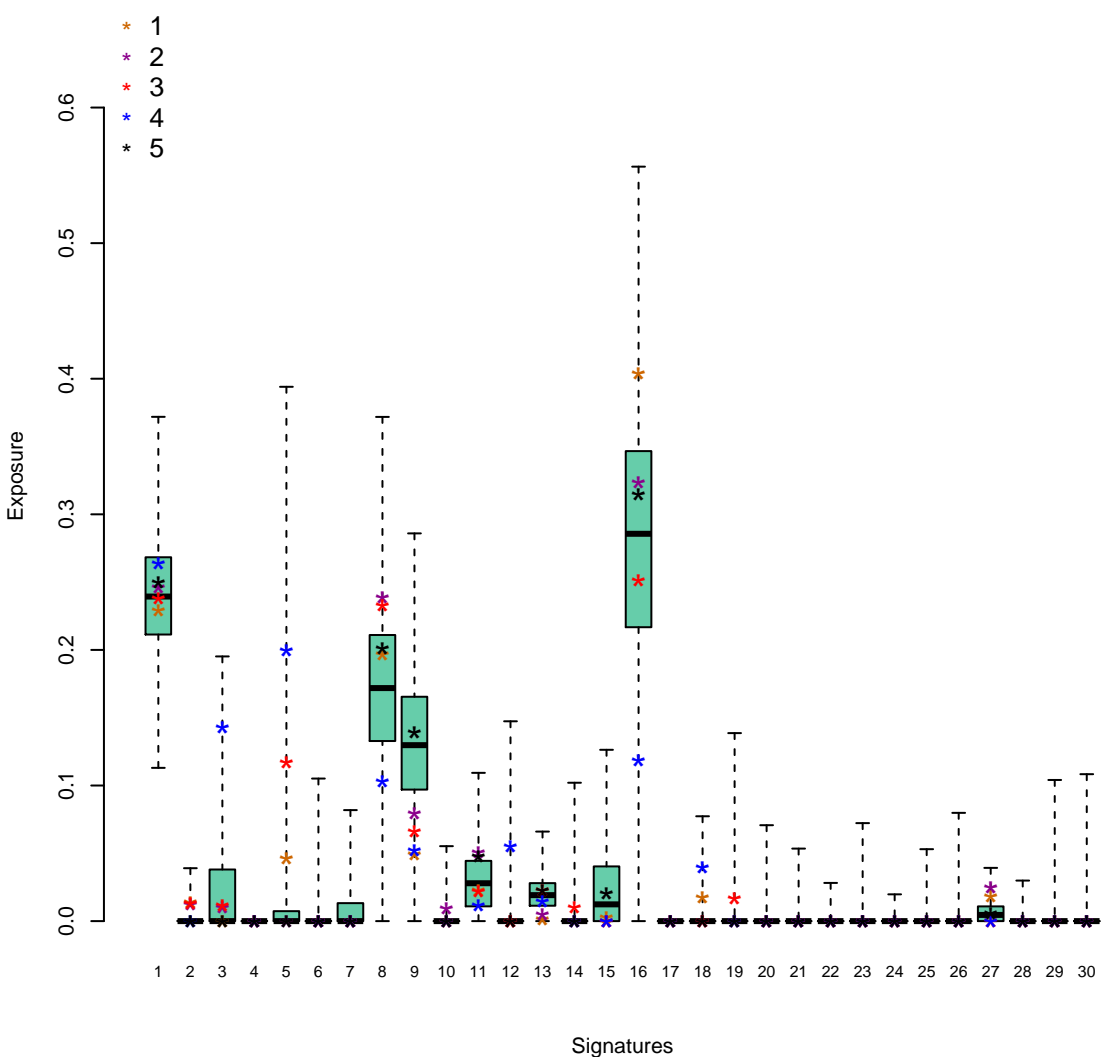

Patient 99 – Reference sample 1

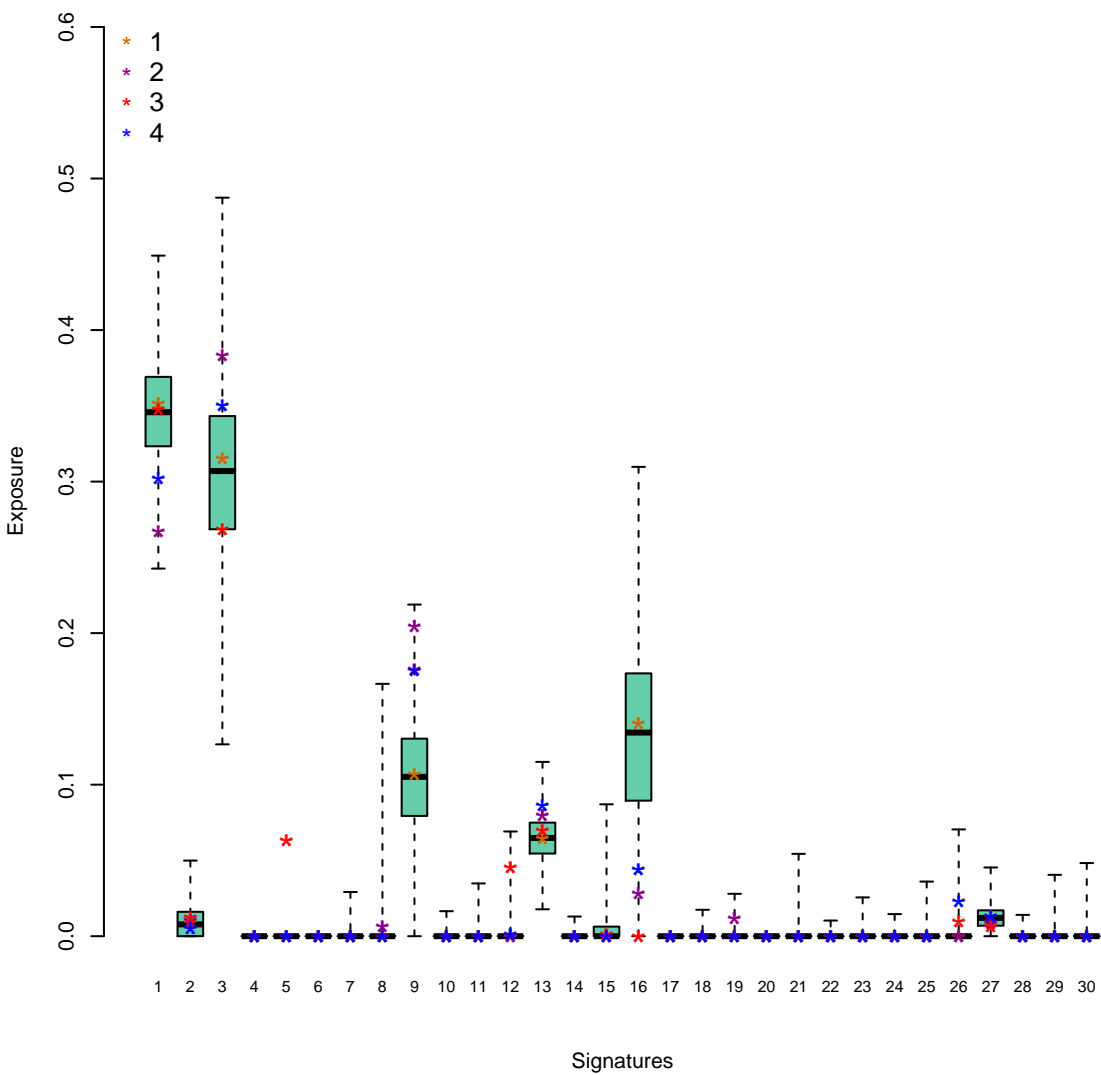

Patient 99 – Reference sample 2

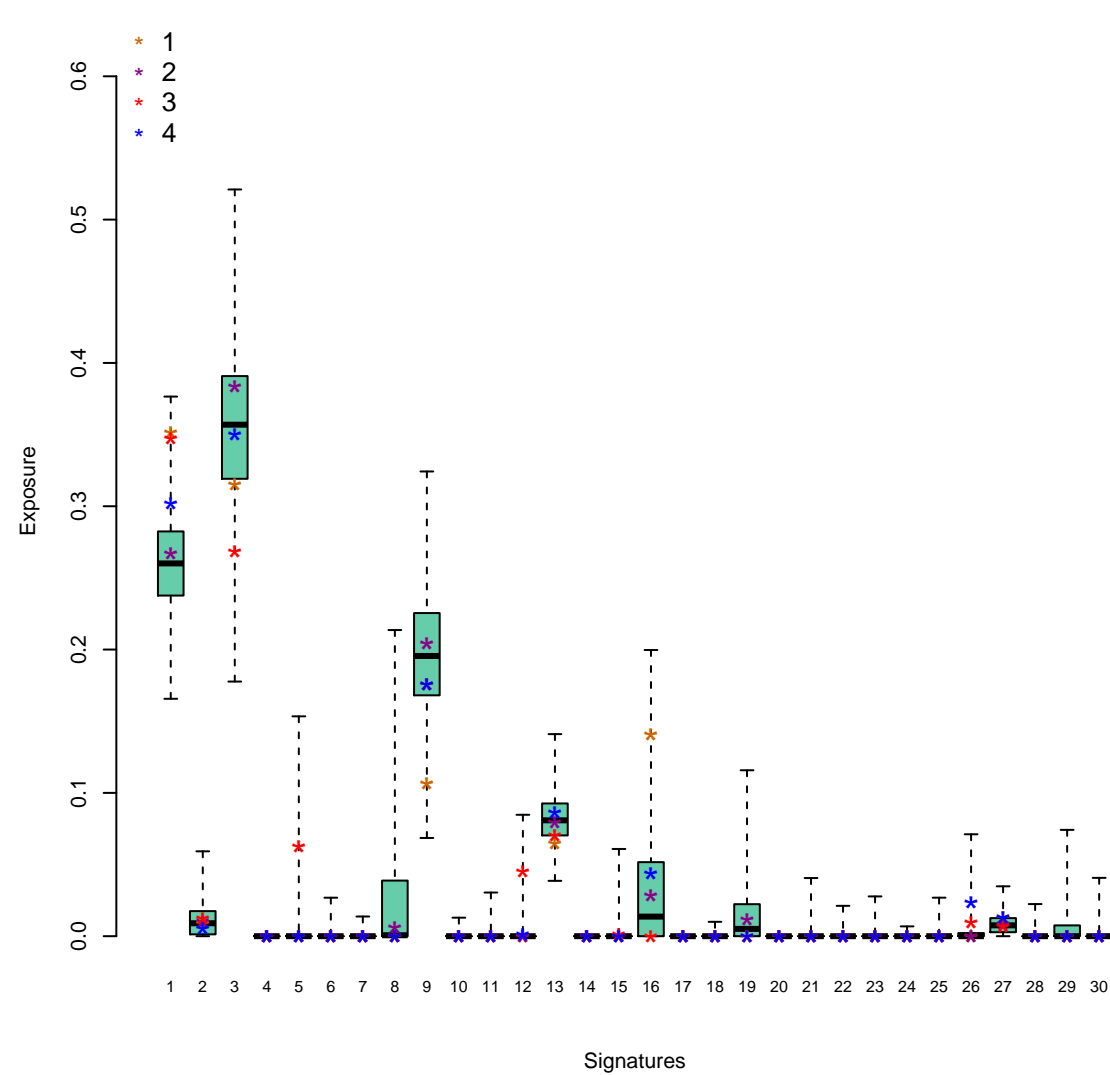

Patient 99 – Reference sample 3

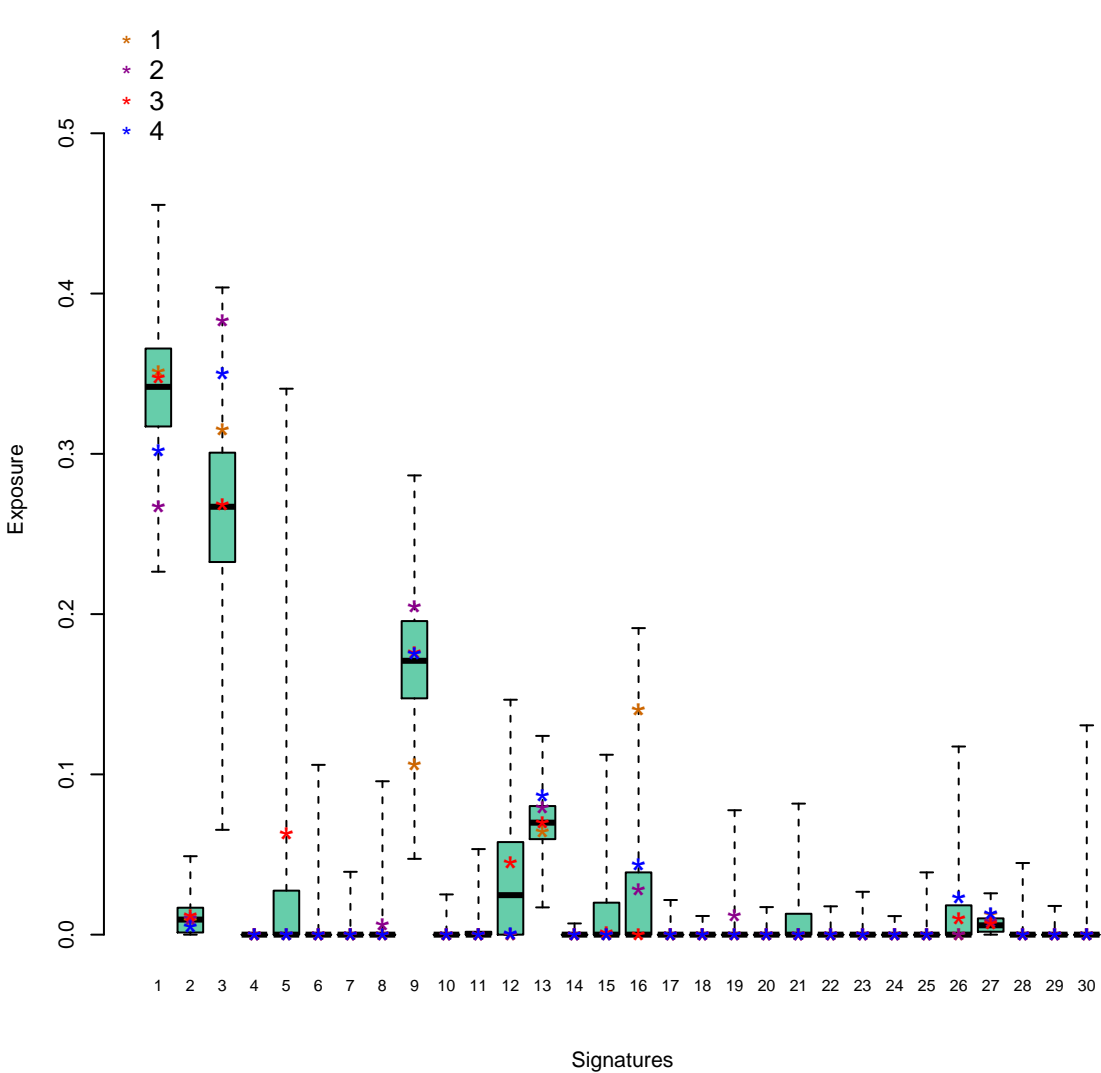

Patient 99 – Reference sample 4

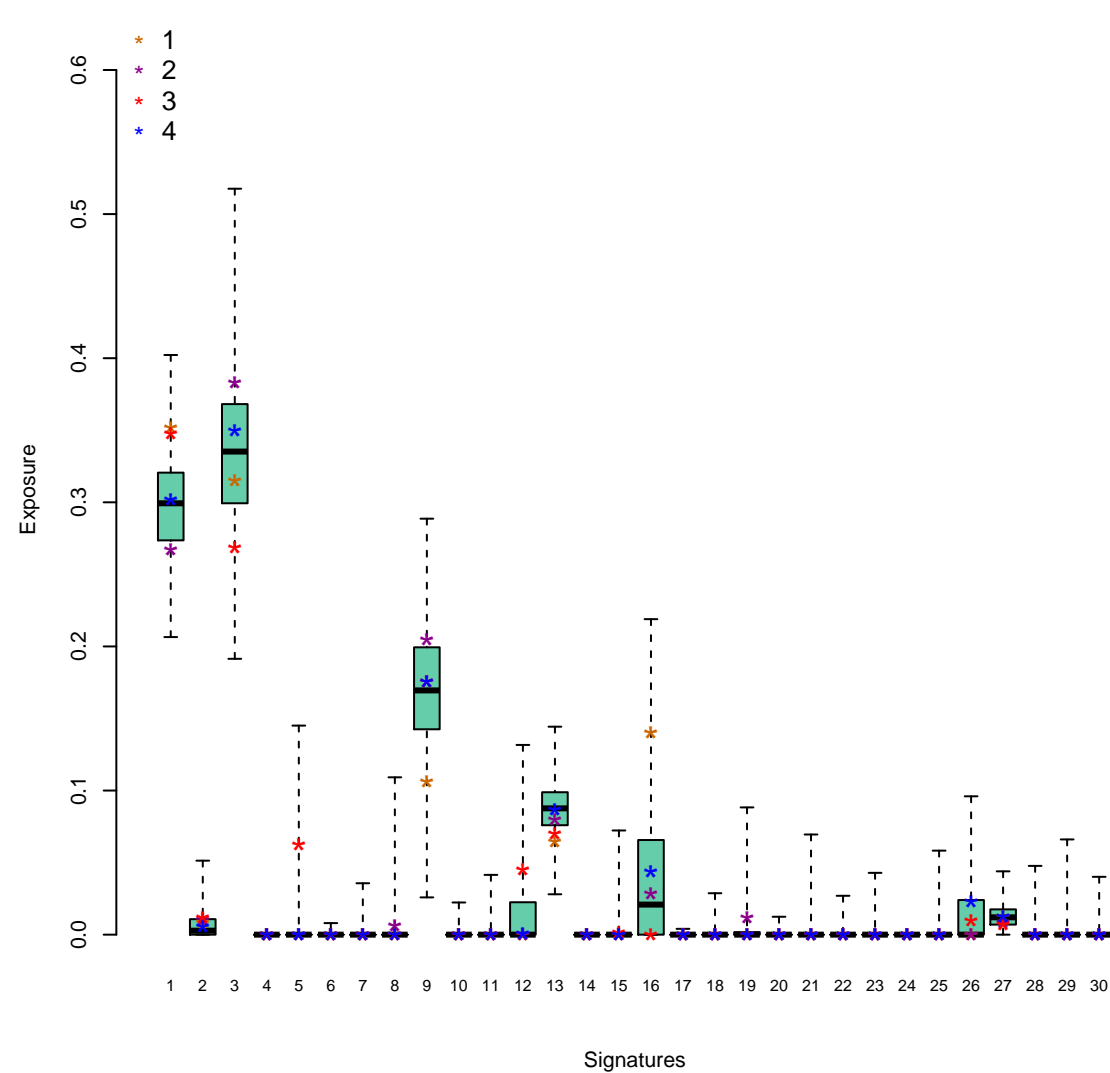

Supplement: 12859_2019_3043_MOESM7_ESM.pdf [file 12859_2019_3043_MOESM7_ESM.pdf]
